# Supplementary material for: Inclusion of Telemedicine in Behavioral Health Quality Measures
Source: Atypon-hosted journal article supplement (doi:10.1176/appi.ps.201900449), 2020-10-20
Supplement: appi.ps.201900449.ds001.pdf [file appi.ps.201900449.ds001.pdf]

Additional references (online supplement)

1. Hilty D, Ferrer D, Parish M, et al: The effectiveness of Telemental health: A 2013 review. *Telemedicine and e-Health*, 2013; 19(6): 444–54.
2. Stain H, Payne K, Thienel R, et al: The feasibility of videoconferencing for neuropsychological assessments of rural youth experiencing early psychosis. *Journal of Telemedicine and Telecare*, 2011; 17(6):328–31. doi: 10.1258/jtt.2011
3. Myers K, Sulzbacher S, Melzer S: Telepsychiatry with children and adolescents: Are patients comparable to those evaluated in usual outpatient care? *Telemedicine Journal and e-Health*, 2004; 10(3): 278–85.
4. Rhode P, Lewinsohn P, Seeley J, Comparability of telephone and face-to-face interviews in assessing axis I and II disorders. *The American Journal of Psychiatry*, 1997; 154(11): 1593–8. doi: 10.1176/ajp.154.11.1593
5. Yellowlees P, Odor A, Parish M, et al: A feasibility study of the use of asynchronous Telepsychiatry for psychiatric consultations. *Psychiatric Services*, 2010; 61(8):838–40. doi: 0.1176/appi.ps.61.8.838.
6. Palmer N, Myers K, Vander-Stoep A, et al: Attention-Deficit/Hyperactivity Disorder and Telemental health. *Current Psychiatry Reports*, 2010; 12(5): 409–17.
7. McGrath P, Lingley-Pottie P, Thurston C, et al: Telephone-based mental health interventions for child disruptive behavior or anxiety disorders: Randomized trials and overall analysis. *Journal of the American Academy of Child and Adolescent Psychiatry*, 2011; 50(11):1162-1172.

8. Myers K, Vander Stoep A, Zhou C, et al: Effectiveness of a telehealth service delivery model for treating Attention-Deficit/Hyperactivity Disorder: A community-based randomized controlled trial. *Journal of the American Academy of Child and Adolescent Psychiatry*, 2015; 54(4), 263–74.
9. García-Lizana F, Muñoz-Mayorga I: Telemedicine for depression: A systematic review. *Perspectives in Psychiatric Care*, 2010; 46(2): 119–26.
10. Leach L, Christensen H: A systematic review of telephone-based Interventions for Mental Disorders. *Journal of Telemedicine and Telecare*, 2006; 12(3): 122–9.
11. Richards D, Richardson T: Computer-based psychological treatments for depression: A systematic review and meta-analysis. *Clinical psychology review*, 2012; 32(4): 329-342.
12. Fortney J, Pyne J, Edlund M, et al: A randomized trial of telemedicine-based collaborative care for depression. *Journal of General Internal Medicine*, 2007; 22(8): 1086–93.
13. Hunkeler E, Meresman J, Hargreaves W, et al: Efficacy of nurse telehealth care and peer support in augmenting treatment of depression in primary care. *Archives of Family Medicine*, 2000; 9(8):700-708.
14. Moreno F, Chong J, Dumbauld J, et al: Use of standard webcam and internet equipment for telepsychiatry treatment of depression among underserved Hispanics. *Psychiatric Services*, 2012; 63(12):1213–17.
15. Simon G, Ludman E, Tutty S, et al: Telephone psychotherapy and telephone care management for primary care patients starting antidepressant treatment: A randomized controlled trial. *Journal of the American Medical Association*, 2004; 292(8): 935–42.

16. Nelson E, Barnard M, Cain S: Treating childhood depression over videoconferencing. *Telemedicine Journal and e-Health*, 2003; 9(1): 49–55.  
doi:10.1089/153056203763317648
17. Myers K, Valentine J, & Melzer S: Feasibility, acceptability, and sustainability of telepsychiatry for children and adolescents. *Psychiatric Services*, 2007; 58(11): 1493–6.  
doi:10.1176/ps.2007.58.11.1493
18. Gros D, Morland L, Greene C, et al: Delivery of evidence-based psychotherapy via video telehealth. *Journal of Psychopathology and Behavioral Assessment*, 2013; 35(4), 506-521. doi:10.1007/s10862-013-9363-4
19. Buckley D, Weisser S: Videoconferencing could reduce the number of mental health patients transferred from outlying facilities to a regional mental health unit. *Australian and New Zealand Journal of Public Health*, 2012; 36(5): 478–82
20. Godleski L, Darkins A, Peters J: Outcomes of 98,609 US department of veteran’s affairs patients enrolled in telemental health services, 2006–2010. *Psychiatric services*. 2012; 63(4):383-385
21. Backhaus A, Agha Z, Maglione M, Repp A, Ross B, Zuest D, Rice-Thorp N, Lohr J., Thorp S: Videoconferencing psychotherapy: A systematic review. *Psychological Services*. 2012; 9(2): 111-131
22. Donoghue K, Patton R, Phillips T, et al: The effectiveness of electronic screening and brief intervention for reducing levels of alcohol consumption: A systematic review and meta-analysis. *Journal of Medical Internet Research*, 2014; 16(6): e142. doi: 10.2196/jmir.3193

23. Young L: Telemedicine interventions for substance-use disorder: A literature review. *Journal of Telemedicine and Telecare*, 2012; 18(1): 47–53. doi: 10.1258/jtt.2011.110608
24. Blankers M, Koeter M, Schippers G: Internet therapy versus internet self-help versus no treatment for problematic alcohol use: A randomized controlled trial. *Journal of Consulting and Clinical Psychology*, 2011; 79(3): 330–41. doi: 10.1037/a0023498
25. Campbell A, Nunes E, Matthews A, et al.: Internet-delivered treatment for substance abuse: A multisite randomized controlled trial. *The American Journal of Psychiatry*, 2014; 171(6), 683–90. doi: 10.1176/appi.ajp.2014.13081055
26. Ruetsch C, Tkacz J, McPherson T, et al: The effect of telephonic patient support on treatment for opioid dependence: Outcomes at one year follow-up. *Addictive Behaviors*, 2012; 37(5):686–9. doi: 10.1016/j.addbeh.2012.01.013

Suppl. Table 1: Behavioral Health Measure Descriptions (Online Supplement)

| Measure                                                                  | Denominator                                                                                                                | Numerator                                                                                                                                                                                                                                                                                                                                                                                                                                                                                                                                                                                                            | Exclusions                                                                                                                                                                                                         | Telemedicine Inclusion                                                                       |
|--------------------------------------------------------------------------|----------------------------------------------------------------------------------------------------------------------------|----------------------------------------------------------------------------------------------------------------------------------------------------------------------------------------------------------------------------------------------------------------------------------------------------------------------------------------------------------------------------------------------------------------------------------------------------------------------------------------------------------------------------------------------------------------------------------------------------------------------|--------------------------------------------------------------------------------------------------------------------------------------------------------------------------------------------------------------------|----------------------------------------------------------------------------------------------|
| Follow-Up After Hospitalization for Mental Illness                       | Members 6 years of age and older who were hospitalized for treatment of mental illness.                                    | <ul style="list-style-type: none"> <li>• 30-day Follow-Up. Discharges for which the member received follow-up within 30 days of discharge.</li> <li>• 7-day Follow-Up. Discharges for which the member received follow-up within 7 days of discharge.</li> </ul>                                                                                                                                                                                                                                                                                                                                                     | All nonacute inpatient stays                                                                                                                                                                                       | Added video conferencing in the numerators                                                   |
| Follow-Up Care for Children Prescribed ADHD Medication                   | Children 6–12 years of age who were newly prescribed ADHD medication.                                                      | <ul style="list-style-type: none"> <li>• Initiation Phase. Members who had an outpatient, intensive outpatient or partial hospitalization follow-up visit with a practitioner with prescribing authority within 30 days after the index prescription start date (IPSD).</li> <li>• Continuation and Maintenance Phase. Members with a prescription dispensed for ADHD medication, who remained on the medication for at least 210 days and who, in addition to the visit in the Initiation Phase, had at least two follow-up visits with a practitioner within 270 days after the Initiation Phase ended.</li> </ul> | <p>Acute inpatient encounter with a principal mental health diagnosis</p> <p>Acute inpatient encounter with a principal diagnosis of chemical dependency</p>                                                       | Added video conferencing in the numerators                                                   |
| Antidepressant Medication Management                                     | Members 18 years of age and older who were treated with antidepressant medication and had a diagnosis of major depression. | <ul style="list-style-type: none"> <li>• Initiation Phase. Members who had at least 84 days of continuous treatment with antidepressant medication beginning on the index prescription start date (IPSD) through 114 days after the IPSD.</li> <li>• Continuation Phase. Members who had at least 180 days of continuous treatment with antidepressant medication beginning on the IPSD through 231 days after the IPSD.</li> </ul>                                                                                                                                                                                  | Members who did not have a diagnosis of major depression in an inpatient, outpatient, ED, intensive outpatient, or partial hospitalization setting during the 60 days prior to the IPSD and 60 days after the IPSD | Added video conferencing and telephone call to the denominator                               |
| Initiation and Engagement of Alcohol and Other Drug Dependence Treatment | Members 13 years of age and older with a new episode of AOD during the first 10 and ½ months of the measurement year.      | <ul style="list-style-type: none"> <li>• Initiation of AOD Treatment. The percentage of members who initiate treatment through an inpatient AOD admission, outpatient visit, intensive outpatient encounter or partial hospitalization within 14 days of the index episode start date.</li> <li>• Engagement of AOD Treatment. The percentage of members who initiated treatment and who had two or more additional services with a diagnosis of AOD within 30 days of the initiation visit.</li> </ul>                                                                                                              | Members who had an AOD diagnosis within 60 days before the index episode start date                                                                                                                                | Added video conferencing, telephone, and online assessment to the denominator and numerators |
| Use of First-Line                                                        | Children and adolescents 1–17                                                                                              | Members who had documentation of psychosocial                                                                                                                                                                                                                                                                                                                                                                                                                                                                                                                                                                        | Members for whom first line                                                                                                                                                                                        | Added video conferencing to                                                                  |

| <b>Measure</b>                                                   | <b>Denominator</b>                                                       | <b>Numerator</b>                                                                                                                                                                                                                                                             | <b>Exclusions</b>                                                                                                                    | <b>Telemedicine Inclusion</b>                                               |
|------------------------------------------------------------------|--------------------------------------------------------------------------|------------------------------------------------------------------------------------------------------------------------------------------------------------------------------------------------------------------------------------------------------------------------------|--------------------------------------------------------------------------------------------------------------------------------------|-----------------------------------------------------------------------------|
| Psychosocial Care for Children and Adolescents on Antipsychotics | years of age who had a new prescription for an antipsychotic medication. | care in the 121-day period from 90 days prior to the IPSP through 30 days after the IPSP.                                                                                                                                                                                    | antipsychotics medications may be clinically appropriate (diagnosis of schizophrenia, bipolar disorder or other psychotic disorders) | the denominator and exclusion                                               |
| Mental Health Utilization                                        | All members                                                              | Members who received the following mental health services during the measurement year: <ul style="list-style-type: none"> <li>• Any service.</li> <li>• Inpatient.</li> <li>• Intensive outpatient or partial hospitalization.</li> <li>• Outpatient or ED.</li> </ul>       | None                                                                                                                                 | Add video conferencing to the numerator                                     |
| Identification of Alcohol and Other Drug Services                | All members                                                              | Members who received the following chemical dependency services during the measurement year: <ul style="list-style-type: none"> <li>• Any service.</li> <li>• Inpatient.</li> <li>• Intensive outpatient or partial hospitalization.</li> <li>• Outpatient or ED.</li> </ul> | None                                                                                                                                 | Added video conferencing, telephone, and online assessment to the numerator |

Suppl. Table 2: Characteristics and Key Findings of Studies on Telemedicine Services for Behavioral Health Conditions (Online Supplement)

| Study                                                             | Country                         | Population             | Study Design                 | Patient Condition                                                                    | Telemedicine Modalities | Key Findings                                                                                                                                                          |
|-------------------------------------------------------------------|---------------------------------|------------------------|------------------------------|--------------------------------------------------------------------------------------|-------------------------|-----------------------------------------------------------------------------------------------------------------------------------------------------------------------|
| <b>Diagnosis of Behavioral Health Conditions Via Telemedicine</b> |                                 |                        |                              |                                                                                      |                         |                                                                                                                                                                       |
| Hubleby, et al., 2016                                             | United States                   | Children & Adults      | Systematic literature review | ADHD, depression, psychosis                                                          | Video conferencing      | Telemedicine assessments made via video conferencing are comparable to face-to-face in terms of reliability.                                                          |
| Elford, et al., 2000                                              | Canada                          | Children & Adolescents | Randomized controlled trial  | ADHD, schizophrenia, bipolar disorder                                                | Video conferencing      | Diagnosis made during video conferencing visits were 96% as effective as diagnosis during face-to-face visits.                                                        |
| Diamond & Bloch, 2010                                             | United States                   | Children & Adolescents | Systematic literature review | ADHD                                                                                 | Video conferencing      | Diagnosis of ADHD via video conferencing was not different from in-person diagnosis.                                                                                  |
| Wells, et al., 1998                                               | United States                   | Children & Adults      | Randomized controlled trial  | Depression                                                                           | Telephone calls         | There was no statistical difference between the depression diagnostic results for patients receiving visits via telephone calls or in person.                         |
| Menon et al., 2001                                                | England                         | Children & Adults      | Experimental study           | Depression                                                                           | Video conferencing      | Results were similar for patients who were diagnosed with depression in person compared to patients diagnosed via video conferencing.                                 |
| Ruskin, et al., 1998                                              | United States                   | Children & Adults      | Randomized controlled trial  | Depression, bipolar disorder, substance dependence                                   | Video conferencing      | The reliability of depression, bipolar disorder, and drug dependence diagnosis was the same for in-person care and video conferencing telemedicine modality.          |
| Hilty, et al., 2013                                               | Americas, Asia & Eastern Europe | Children & Adolescents | Systematic literature review | Schizophrenia, bipolar, and other psychotic disorders                                | Video conferencing      | Telemedicine was effective in diagnosing children and adolescents with schizophrenia, bipolar disorder, and other psychotic disorders.                                |
| Stain, et al., 2011                                               | Sweden                          | Children & Adolescents | Experimental study           | Schizophrenia and bipolar disorder                                                   | Video conferencing      | This study showed no difference between diagnosing young adults (aged 14–30) with schizophrenia and bipolar disorders in person or through video conferencing visits. |
| Myers, et al., 2004                                               | United States                   | Children & Adults      | Program evaluation           | Mood & anxiety disorders, psychotic disorders, ADHD and disruptive behavior disorder | Video conferencing      | Video conferencing services were found to be as effective as in-person visits for diagnosing various psychiatric disorders in children.                               |

| Study                                                             | Country            | Population             | Study Design                 | Patient Condition      | Telemedicine Modalities             | Key Findings                                                                                                                                                  |
|-------------------------------------------------------------------|--------------------|------------------------|------------------------------|------------------------|-------------------------------------|---------------------------------------------------------------------------------------------------------------------------------------------------------------|
| Rhode, Lewinsohn & Seely, 1997                                    | United States      | Adults                 | Program evaluation           | Substance use disorder | Telephone calls                     | Telephone call assessments were found feasible in effectively diagnosing substance use disorders, when compared with in-person visits.                        |
| Yellowlees, et al., 2010                                          | United States      | Adults                 | Program evaluation           | Substance use disorder | Online assessment                   | Online web portals provided an effective platform for diagnosing substance use disorders.                                                                     |
| <b>Treatment of Behavioral Health Conditions via Telemedicine</b> |                    |                        |                              |                        |                                     |                                                                                                                                                               |
| Palmer, et al., 2010                                              | United States      | Children & Adolescents | Systematic literature review | ADHD                   | Video conferencing                  | Telemedicine modalities are readily accessible models for delivering timely therapeutic care for patients with ADHD.                                          |
| McGrath, et al., 2011                                             | Australia          | Children               | Randomized controlled trial  | ADHD                   | Telephone calls                     | Telephone-based therapeutic services decreased symptoms of ADHD compared to no care.                                                                          |
| Myers, et al., 2015                                               | United States      | Children & Adolescents | Randomized controlled trial  | ADHD                   | Video conferencing                  | Children treated by psychiatrists using video conferencing modality showed more positive improvements than children treated in person in primary care.        |
| Garcia-Lizana, et al., 2010                                       | US, Canada & Spain | Children & Adults      | Systematic literature review | Depression             | Video conferencing, telephone calls | Video conferencing and telephone calls are as effective as in-person care in treating patients with depression.                                               |
| Leach & Christensen, 2006                                         | United States      | Children & Adults      | Systematic literature review | Depression             | Telephone calls                     | Antidepressant medication adherence was higher for patients monitored via telephone calls than for patients monitored with in-person visits.                  |
| Richards & Richardson, 2009                                       | United States      | Children & Adults      | Systematic literature review | Depression             | Web-based                           | Web-based psychological care was found to be more effective than in-person care in treating clinical depression.                                              |
| Fortney, et al., 2015                                             | United States      | Children & Adults      | Randomized controlled trial  | Depression             | Telephone calls                     | Telephone call follow-ups facilitated by nurses improved adherence to antidepressant medications compared with in-person follow-up care.                      |
| Hunkeler et al., 2000                                             | United States      | Children & Adults      | Randomized controlled trial  | Depression             | Telephone calls                     | Telephone calls improved depression symptoms and patient satisfaction compared with an in-person visit.                                                       |
| Moreno, et al., 2012                                              | Netherlands        | Children & Adults      | Randomized controlled trial  | Depression             | Video conferencing                  | Patients in a video conferencing treatment group showed reduced depressive symptoms and better quality of life than patients in an in-person treatment group. |



| Study                  | Country       | Population             | Study Design                 | Patient Condition                                                                                | Telemedicine Modalities                                | Key Findings                                                                                                                                                                               |
|------------------------|---------------|------------------------|------------------------------|--------------------------------------------------------------------------------------------------|--------------------------------------------------------|--------------------------------------------------------------------------------------------------------------------------------------------------------------------------------------------|
| Simon, et al., 2004    | United States | Children & Adults      | Randomized controlled trial  | Depression                                                                                       | Telephone calls                                        | The use of telephone visits for treatment monitoring had higher patient satisfaction ratings than for patients in in-person care.                                                          |
| Nelson, et al., 2003   | United States | Children & Adolescents | Randomized controlled trial  | Schizophrenia                                                                                    | Video conferencing                                     | The study found that in comparison to in-person care, cognitive behavioral therapy delivered via video conferencing reduced symptoms for childhood psychotic disorders like schizophrenia. |
| Myers, et al., 2007    | United States | Children & Adolescents | Program evaluation           | Mood & anxiety disorders, ADHD, developmental disorders                                          | Video conferencing                                     | Video conferencing services were found to be as effective as in-person visits for treating various psychiatric disorders, in children and adolescents aged 2–21 years.                     |
| Gros, et al., 2013     | United States | Children & Adults      | Systematic literature review | Mood & anxiety disorders, tobacco use disorder, illicit drug abuse                               | Video conferencing                                     | Video conferencing modality was as effective as in-person care in treating patients with mental health conditions.                                                                         |
| Buckley, et al., 2012  | Australia     | Children & Adults      | Pre-and post-study           | Mood & anxiety disorders, bipolar, schizophrenia, personality disorders, developmental disorders | Video conferencing                                     | The study found that video conferencing visits increased the ability to treat and manage mental health patients, reducing rates of admission to central hospital psychiatric units.        |
| Godleski, et al., 2012 | United States | Children & Adults      | Pre-and post-study           | Posttraumatic stress disorder, substance use disorder                                            | Video conferencing                                     | The study found that video conferencing visits increased adherence to treatments and reduced hospitalization.                                                                              |
| Backhaus, et al., 2012 | United States | Adults                 | Systematic literature review | Substance use disorder                                                                           | Video conferencing                                     | Video conferencing was as effective as in-person care in initiating and monitoring treatment for patients with substance use disorders.                                                    |
| Donoghue et al., 2014  | United States | Adults                 | Systematic literature review | Substance use disorder                                                                           | Asynchronous (web-based)                               | At 3 months, significant mean difference in grams of ethanol consumed per week for the group that received web-based treatment and the control group that had face-to-face visits.         |
| Young, 2012            | United States | Adults                 | Systematic literature review | Substance use disorder                                                                           | Video conferencing, telephone calls, online assessment | Telephone calls, online monitoring, and video conferencing modalities are effective in treating persons with substance use disorders.                                                      |
| Blankers, et al., 2011 | United States | Adults                 | Randomized controlled trial  | Substance use disorder                                                                           | Online assessment                                      | Participants in an online therapy group showed reduced rates of alcohol consumption in comparison to in-person therapy or self-help                                                        |

| Study                  | Country       | Population | Study Design                | Patient Condition      | Telemedicine Modalities | Key Findings                                                                                                                                       |
|------------------------|---------------|------------|-----------------------------|------------------------|-------------------------|----------------------------------------------------------------------------------------------------------------------------------------------------|
|                        |               |            |                             |                        |                         | groups.                                                                                                                                            |
| Campbell, et al., 2014 | Wales         | Adults     | Randomized controlled trial | Substance use disorder | Online assessment       | Participants in an online treatment group had lower dropout rates and higher abstinence from substance use than participants in face-to-face care. |
| Reutsch, et al., 2012  | United States | Adults     | Randomized controlled trial | Substance use disorder | Telephone calls         | Telephone support program improved compliance with medication-assisted treatment for substance use disorder in comparison with in-person care.     |
